# Supplementary material for: Two-dimensional MXO/MoX2 (M = Hf, Ti and X = S, Se) van der Waals heterostructure: a promising photovoltaic material
Source: Royal Society of Chemistry journal article supplement (doi:10.1039/d2ra03204j), 2022-01-01
Supplement: d2ra03204j1.pdf [file d2ra03204j1.pdf]

# Supporting Information

## **Two-Dimensional MXO/MoX<sub>2</sub> (M=Hf, Ti and X= S, Se) Van der Waals Heterostructure: A Promising Photovoltaic Material**

Aman kassaye Sibhatu<sup>1,4</sup>, Georgies Alene,<sup>2</sup> Abubeker Yimam<sup>1\*</sup>, Tamiru Teshome<sup>3\*</sup>

<sup>1</sup>Department of Chemical Engineering, School of Chemical and Bio Engineering, Addis Ababa institute of Technology, Addis Ababa University, Addis Ababa, Ethiopia.

<sup>2</sup>Center for Materials Engineering, Addis Ababa Institute of Technology, School of Multi-disciplinary Engineering, Addis Ababa, 1000, Ethiopia

<sup>3</sup>Department of Physics, College of Natural and Social Science, Addis Ababa Science and Technology University, P. O. Box 16417, Addis Ababa, Ethiopia.

<sup>4</sup>Department of Chemical Engineering, College Biological and Chemical Engineering, Addis Ababa Science and Technology University, P. O. Box 16417, Addis Ababa, Ethiopia.

\*Corresponding authors; email: - [tamiruteshome@gmail.com](mailto:tamiruteshome@gmail.com); [tel:- +251 966 253 809](tel:+251966253809)  
[abubeker.yimam@aau.edu.et](mailto:abubeker.yimam@aau.edu.et); [tel:- +251911950214](tel:+251911950214)

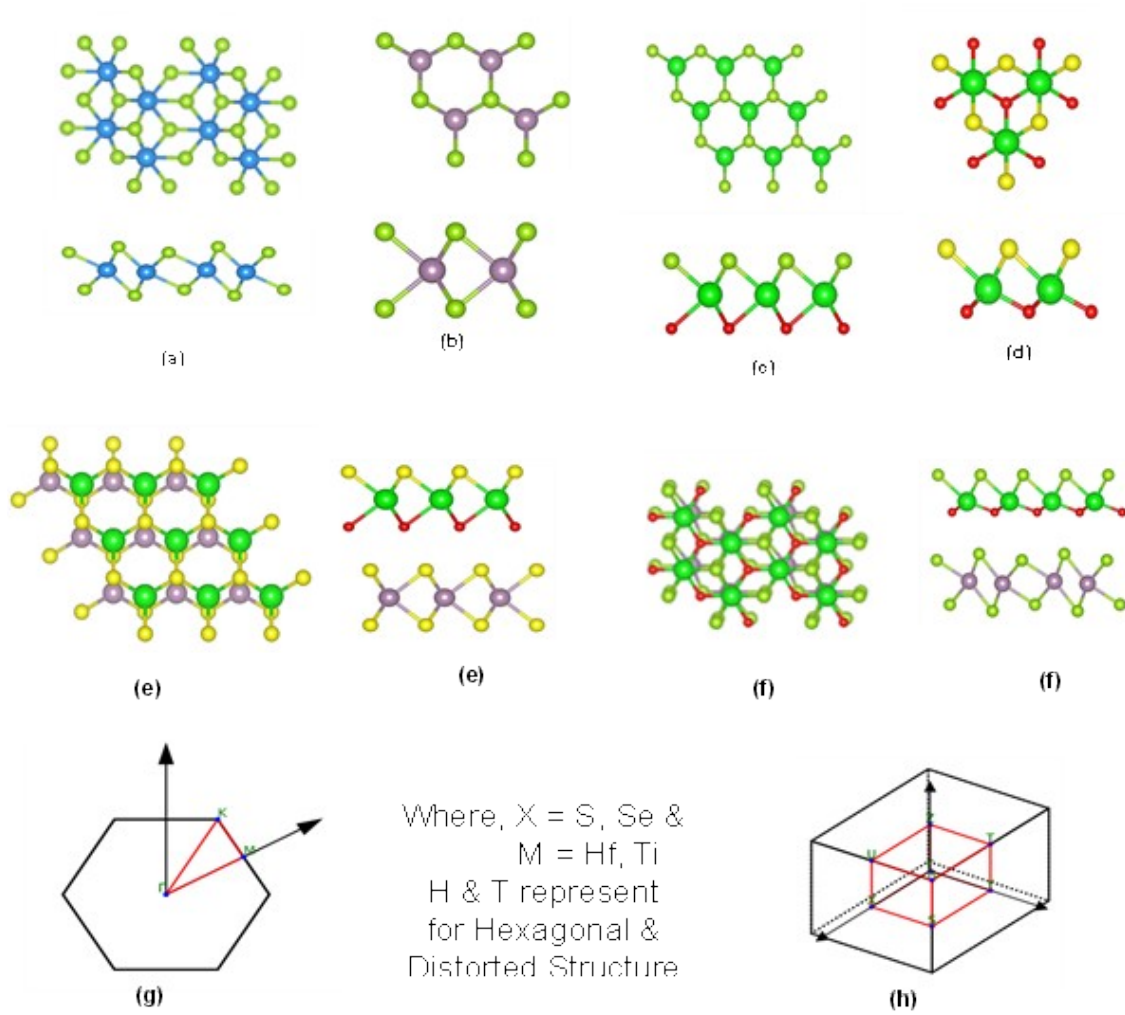

Figure S1: Top and side perspectives Janus and TMDs monolayers with heterostructure (a) T-MoX<sub>2</sub>, (b) H-MoX<sub>2</sub>, (c) H-MXO, (d) T-MXO, (e) H-MXO/MoX<sub>2</sub>, (f) T-MXO/MoX<sub>2</sub>, (g) 2H phase Brillion zone (GMKG), and (h) T phase Brillion zone (GXSYG)

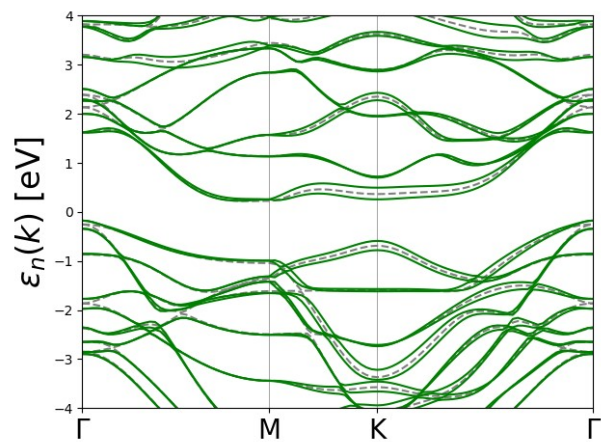

(a)

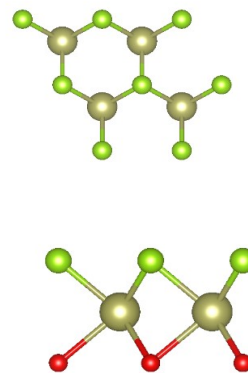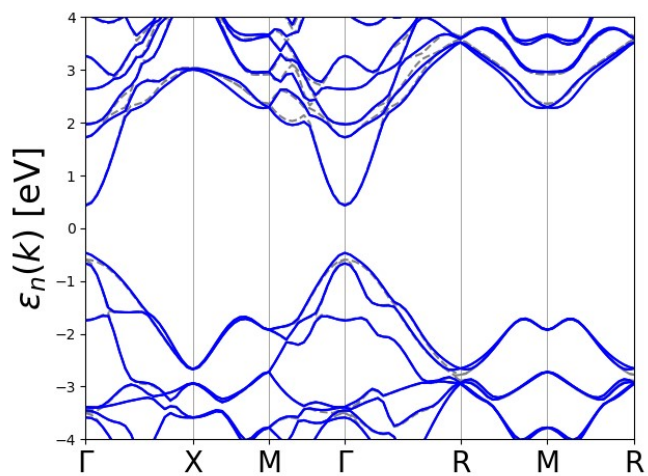

(b)

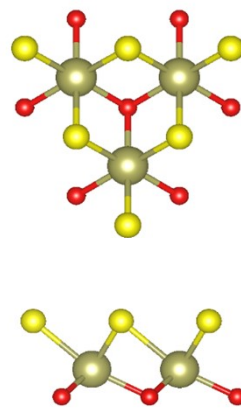

Figure S2: Band structure of Janus with crystal structure (a) hexagonal HfSeO and (b) distorted HfSO

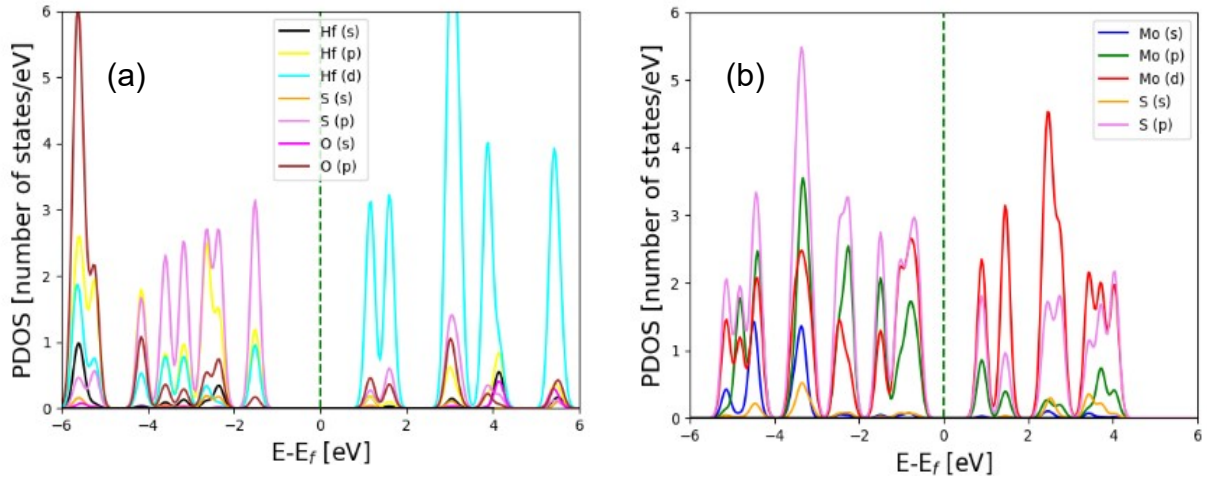

Figure S3: PDOS of Distorted (a) HfSO and (b) MoS<sub>2</sub>

Table S1: The compared hexagonal stacking Total (E<sub>t</sub>), Janus (E<sub>J</sub>), TMDs (E<sub>T</sub>), and binding (E<sub>b</sub>) energy

|                        | heterostructure | Energy (eV)                | Binding Energy (eV)       |                                                                  |
|------------------------|-----------------|----------------------------|---------------------------|------------------------------------------------------------------|
| Hexagonal<br>(H) Stack | AA              | E <sub>t</sub> =-39.042526 | E <sub>b</sub> =-0.01043  | @<br>k=15x15x1<br>E <sub>cut</sub> =520ev<br>a=b=3.35Å<br>d=3.5Å |
|                        |                 | E <sub>J</sub> =-21.007891 |                           |                                                                  |
|                        |                 | E <sub>T</sub> =-18.02420  |                           |                                                                  |
|                        | A1A             | E <sub>t</sub> =-39.578522 | E <sub>b</sub> =-0.176152 |                                                                  |
|                        |                 | E <sub>J</sub> =-19.112645 |                           |                                                                  |
|                        |                 | E <sub>T</sub> =-20.289725 |                           |                                                                  |
|                        | AA1             | E <sub>t</sub> =-39.541914 | E <sub>b</sub> =-0.140135 |                                                                  |
|                        |                 | E <sub>J</sub> =-19.112066 |                           |                                                                  |
|                        |                 | E <sub>T</sub> =-20.289713 |                           |                                                                  |

Table S2: Total energy and band gap of the distorted (T) stacking are shown were, A1, A2, A3 & A4 for distorted (T) stacking

| <u>Stacking</u> | A <sub>1</sub> | A <sub>2</sub> | A <sub>3</sub> | A <sub>4</sub> |
|-----------------|----------------|----------------|----------------|----------------|
| Energy (eV)     | -90.679        | -90.679        | -90.773        | -90.64         |
| Band Gap (eV)   | 1.158          | 1.212          | 1.00           | 1.09           |

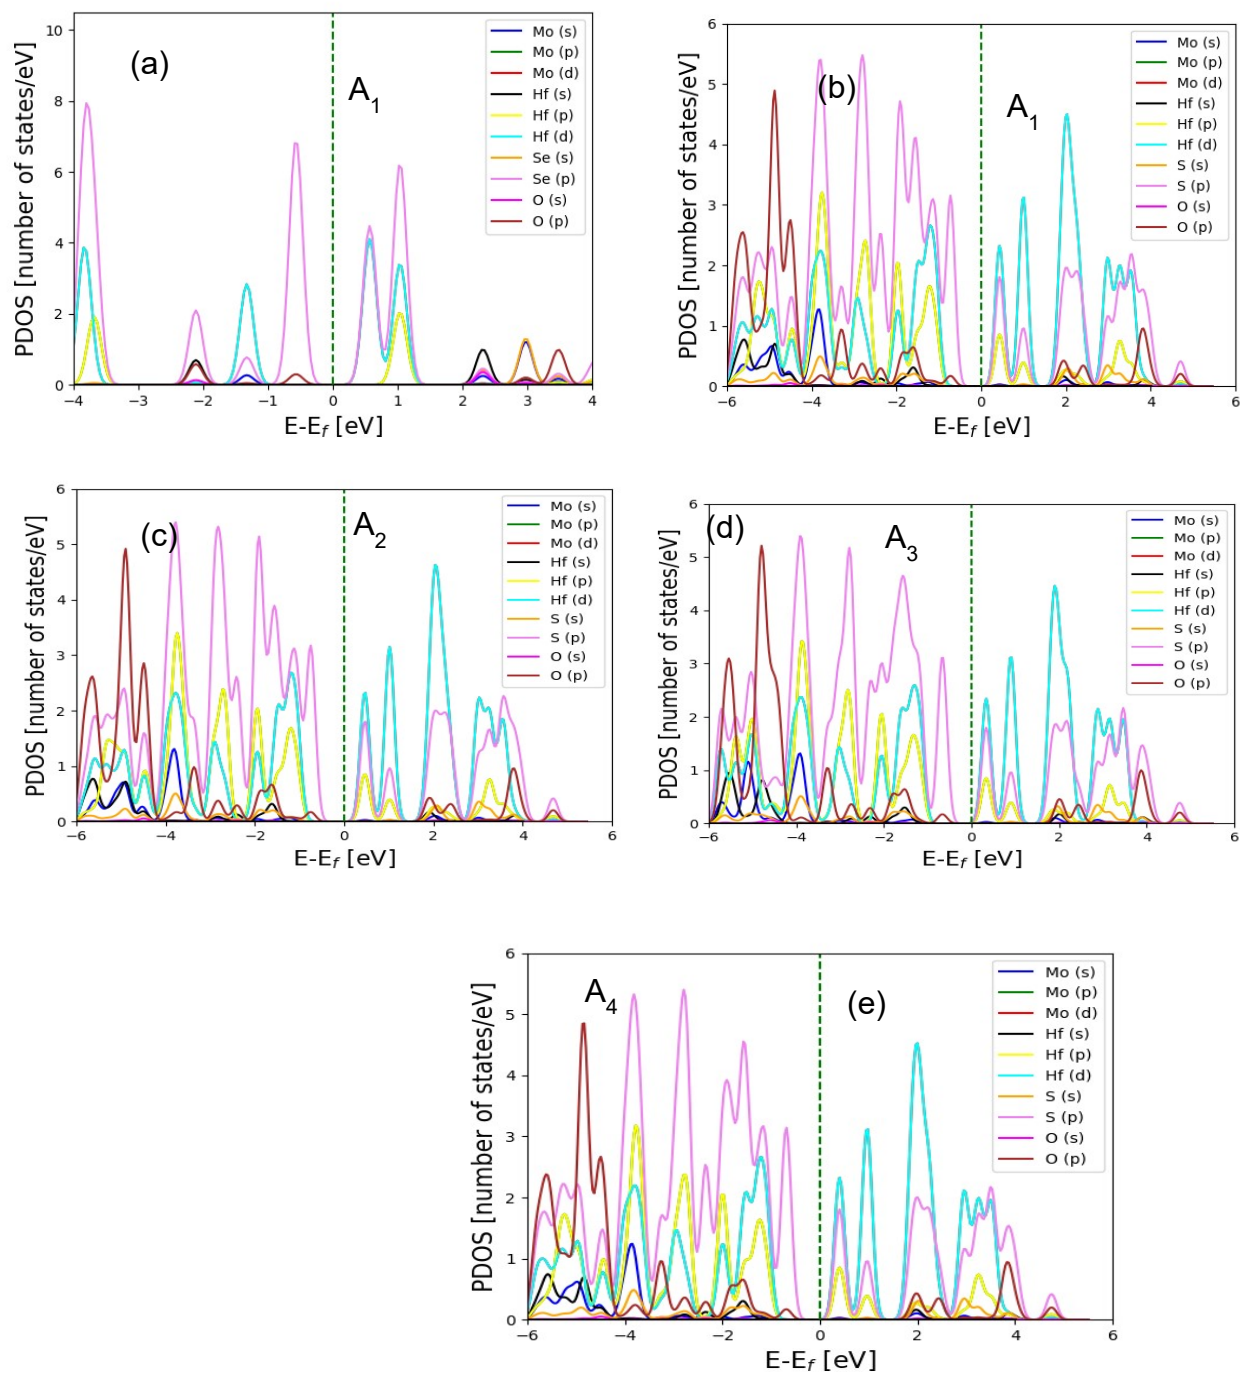

Figure S4: PDOS of the selected (a) A1A hexagonal Stack and distorted (b) A1, (c) A2, (d) A3, and (e) A4 stacking

## Strain effects on band gap

The strain effects are investigated here. The strain considerably changes the band structure of the material HfSeO/MoSe<sub>2</sub>, which has a band gap of 0.52eV, which is among the researched materials with a tiny band gap. We found as shown in the Figure-1 below that the band gap change when applying a strain (-6% to +6%) on hetero-structure during compressive strain it increased while the tensile reduced the band gap. The band gap become maximum is 1.2eV at the compressive strain of -6%. As a result, we can tune the band gap using strain engineering, and in our case, the band gap increases during compression.

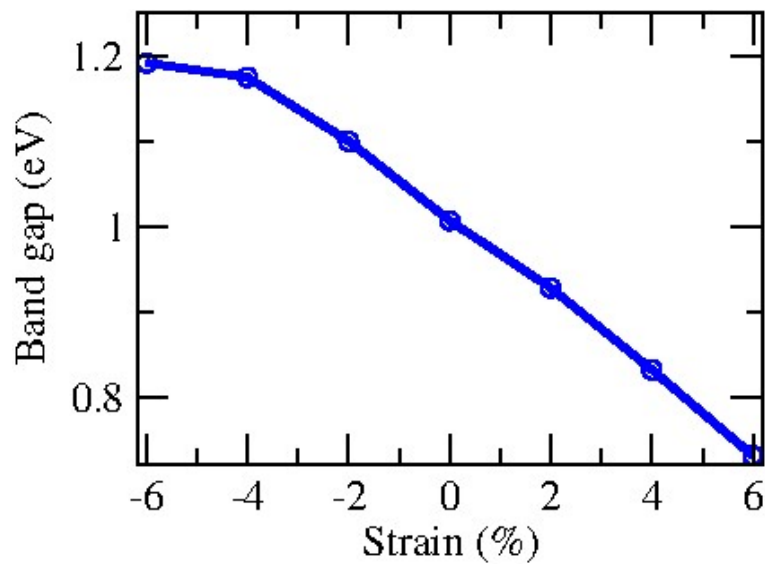

Figure S5: Strain vs band gap for HfSeO/MoSe<sub>2</sub>



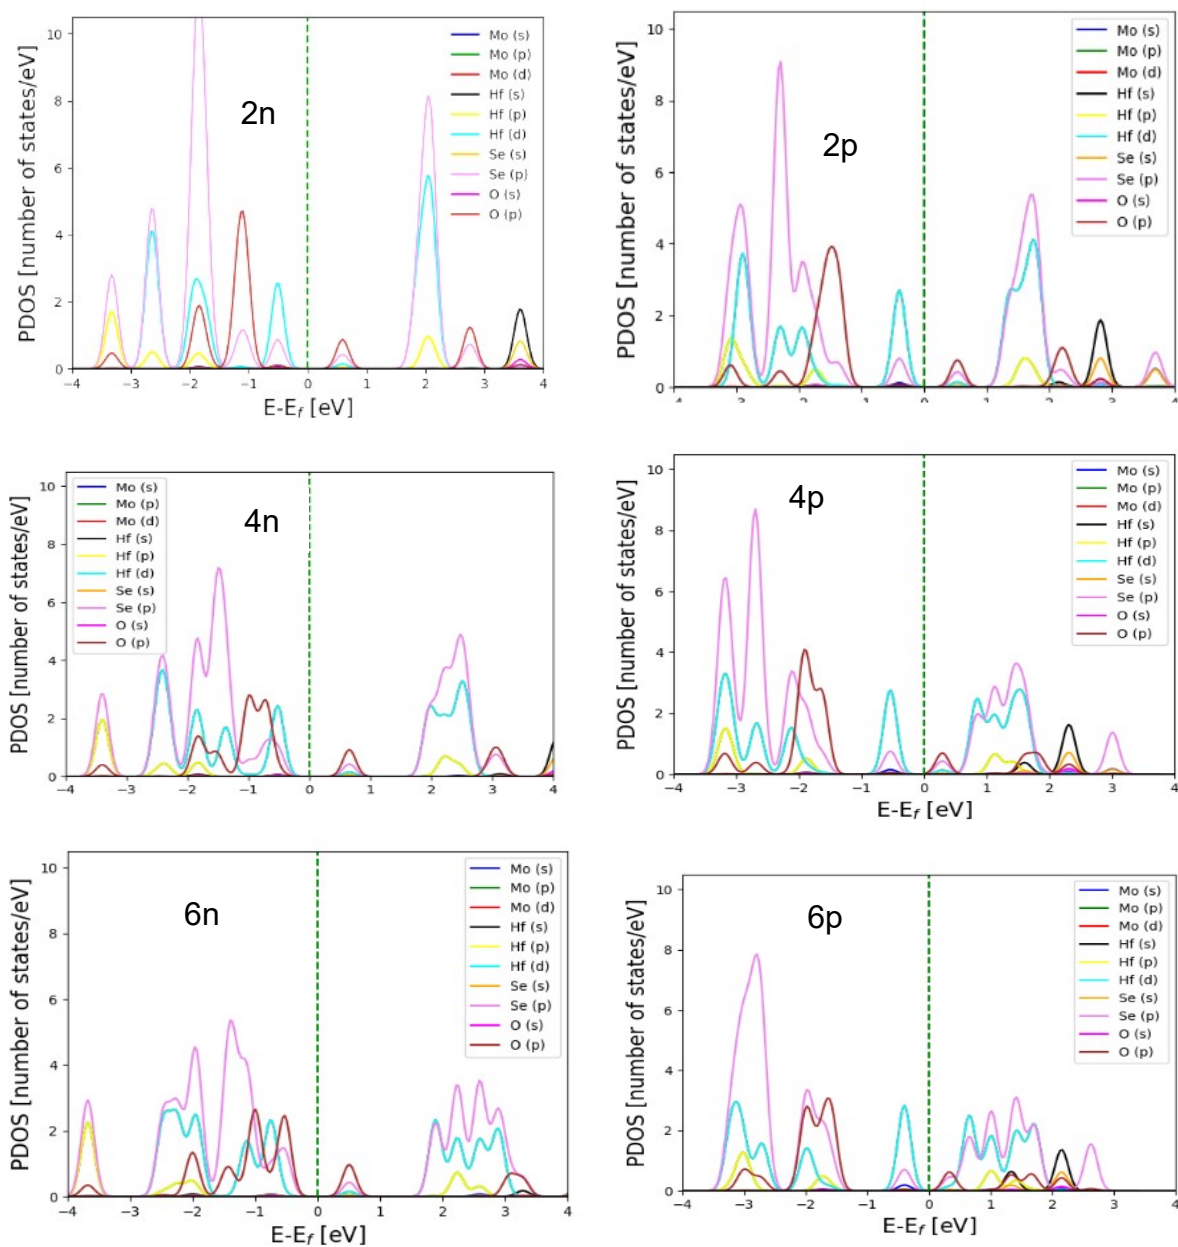

Figure S6: depicts the change in PDOS for the specified strain to HfSeO/MoSe<sub>2</sub> (compressive strain increments of -2%, -4%, and 6%, and tensile strain increases of +2%, +4%, and +6%). Where, n represents compressive strain and p represents tensile strain.



Table S3 Bandgap values of the heterostructure using PBE and HSE06 functionals

| Heterostructure           | Bandgap (eV) |       |
|---------------------------|--------------|-------|
|                           | PBE          | HSE06 |
| H-HfSeO/MoSe <sub>2</sub> | 1.396        | 1.925 |
| H-TiSeO/MoSe <sub>2</sub> | 1.443        | 2.302 |
| H-HfSO/MoS <sub>2</sub>   | 1.669        | 2.203 |
| H-TiSO/MoS <sub>2</sub>   | 1.972        | 2.801 |
| T-HfSeO/MoSe <sub>2</sub> | 0.525        | 0.725 |
| T-TiSeO/MoSe <sub>2</sub> | 1.014        | 1.513 |
| T-HfSO/MoS <sub>2</sub>   | 1.056        | 1.642 |
| T-TiSO/MoS <sub>2</sub>   | 1.464        | 1.824 |

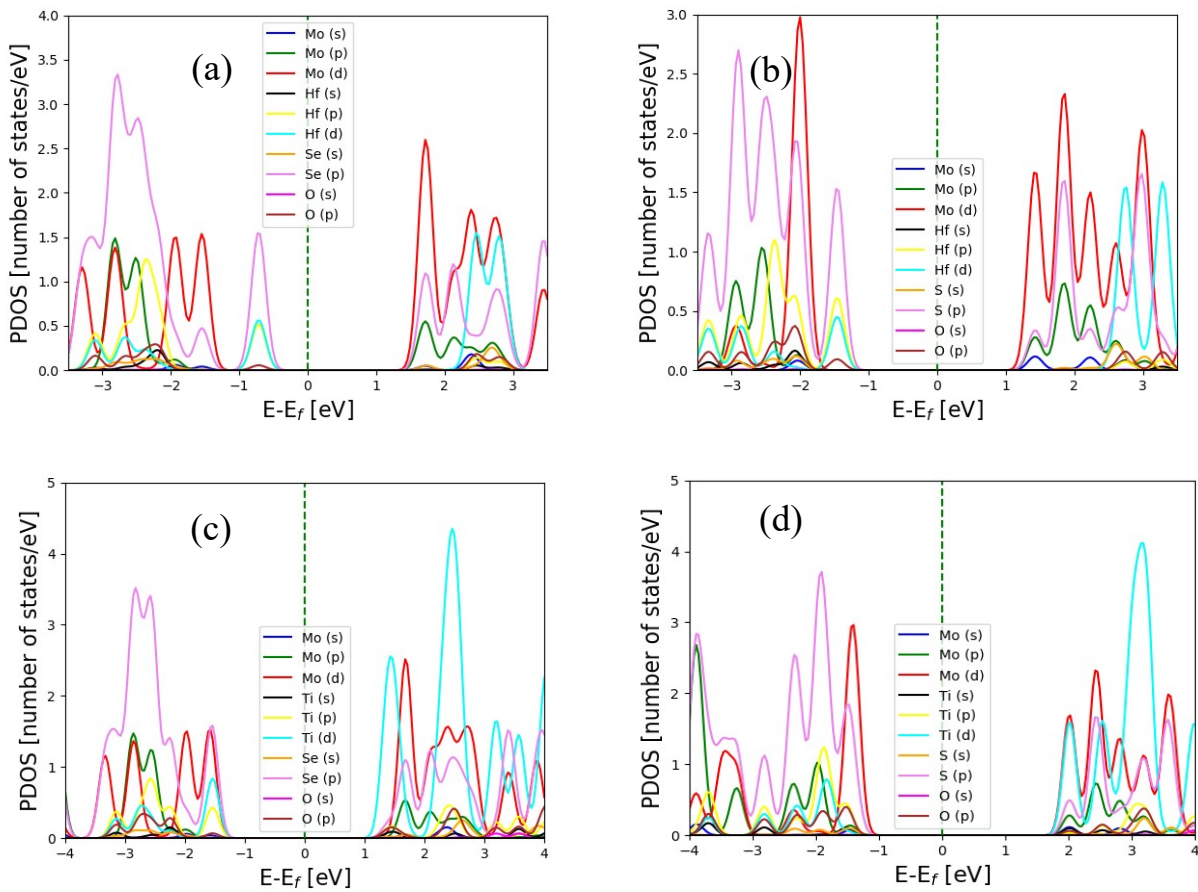

Figure S7: Bandgap using hybrid functional for Hexagonal heterostructure (a)H-HfSeO/MoSe<sub>2</sub>, (b)H-HfSO/MoS<sub>2</sub>, (c)H-TiSeO/MoSe<sub>2</sub>, and (d)H-TiSO/MoS<sub>2</sub>

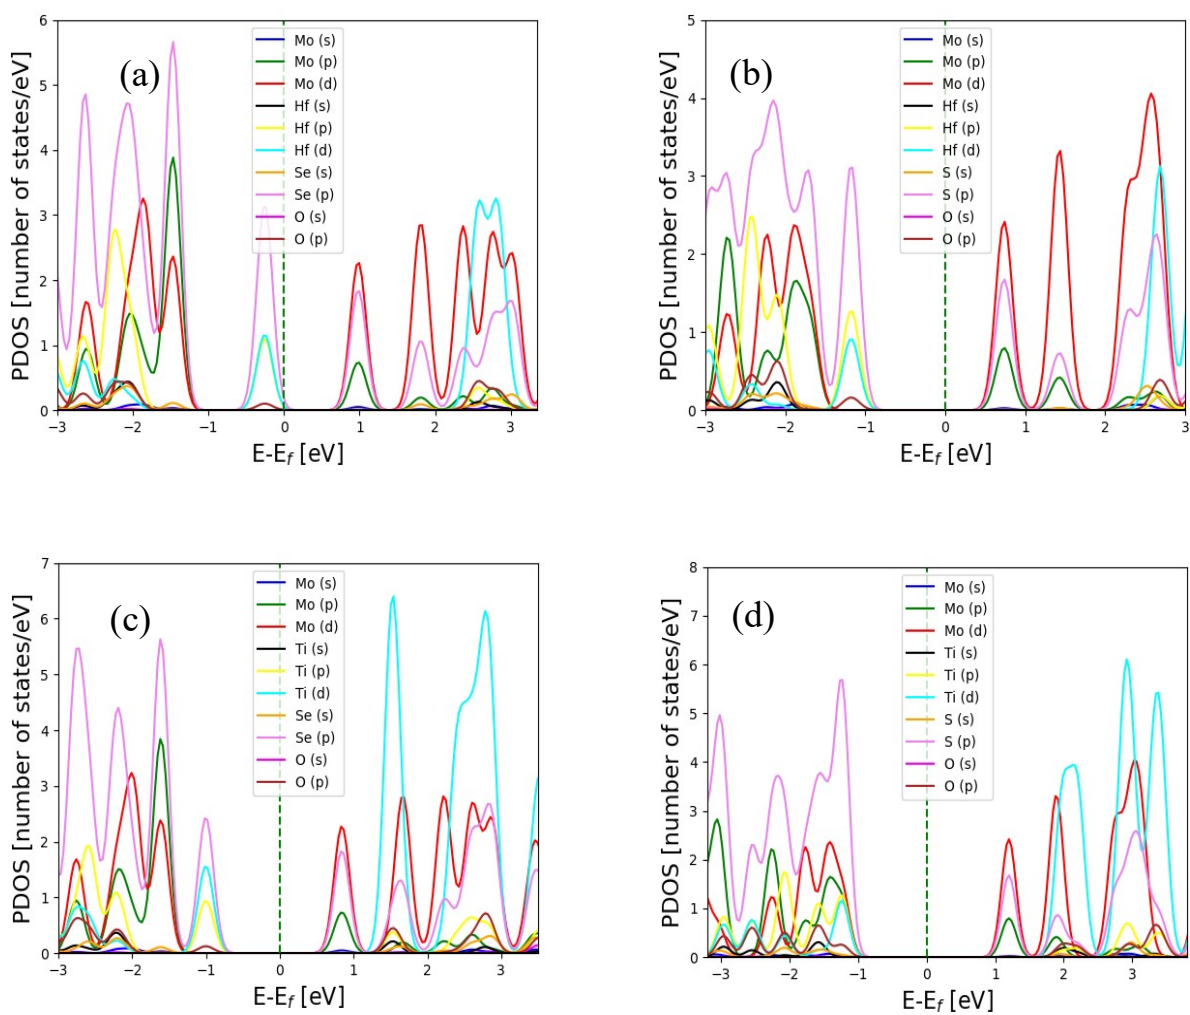

Figure S8: Bandgap of Distorted heterostructure using hybrid functional (a)T-HfSeO/MoSe<sub>2</sub>, (b)T-HfSO/MoS<sub>2</sub>, (c)T-TiSeO/MoSe<sub>2</sub>, and (d)T-TiSO/MoS<sub>2</sub>
